# Supplementary material for: Distinctive Pattern of Serum Elements During the Progression of Alzheimer’s Disease
Source: PubMed Central journal article supplement (PMC4783774; doi:10.1038/srep22769), 2016-03-09

## **Distinctive Pattern of Serum Elements During the Progression of Alzheimer's Disease**

Giuseppe Paglia<sup>1,2</sup>, Oto Miedico<sup>2</sup>, Adriana Cristofano<sup>3</sup>, Michela Vitale<sup>3</sup>, Antonella Angiolillo<sup>3</sup>, Antonio Eugenio Chiaravalle<sup>2</sup>, Gaetano Corso<sup>4\*</sup>, Alfonso Di Costanzo<sup>3</sup>.

<sup>1</sup> Center for Biomedicine, EURAC Research, Via Galvani 31, 39100 Bolzano, Italy

<sup>2</sup> Istituto Zooprofilattico Sperimentale di Puglia e Basilicata, via Manfredonia 20, 71121, Foggia, Italy

<sup>3</sup> Centre for Research and Training in Medicine for Aging, Department of Medicine and Health Sciences "V Tiberio", University of Molise, Via De Sanctis 1, 86100, Campobasso, Italy

<sup>4</sup> Department of Clinical and Experimental Medicine, University of Foggia, Viale L. Pinto 1, 71122, Foggia, Italy

\* Corresponding Author

Prof. Gaetano Corso, Department of Clinical and Experimental Medicine, University of Foggia, Viale L. Pinto 1, 71122, Foggia, Italy.

Tel.: +39 0881 588055; Fax: +39 0881 588037

e-mail: [gaetano.corso@unifg.it](mailto:gaetano.corso@unifg.it)

**Table S1.** Loading of principal component analysis (PCA). First and second principal components (PC1 and PC2) of Figure 1.

**Table S2.** Elements and ratios included in the multivariate ROC model of Figure 6.

**Figure S1.** Potential biomarkers for discriminating between HS and SMC samples and SMC and MCI samples.

**Table S1.** Loading of principal component analysis (PCA). First and second principal components (PC1 and PC2) of Figure 1.

| <b>ELEMENT</b> | <b>PC1</b> | <b>PC2</b> |
|----------------|------------|------------|
| Mn             | 0.077      | -0.452     |
| Zn             | 0.246      | -0.382     |
| Se             | 0.251      | -0.353     |
| Hg             | -0.006     | -0.327     |
| Fe             | 0.270      | -0.200     |
| Tl             | -0.073     | -0.198     |
| Cr             | 0.053      | -0.137     |
| Co             | 0.314      | -0.126     |
| Ca             | 0.404      | -0.032     |
| Sb             | 0.093      | -0.017     |
| Ni             | 0.221      | -0.001     |
| Pb             | 0.081      | 0.014      |
| As             | 0.228      | 0.024      |
| Cu             | 0.325      | 0.040      |
| Be             | 0.036      | 0.054      |
| Al             | 0.151      | 0.158      |
| Sr             | 0.254      | 0.165      |
| Sn             | 0.177      | 0.192      |
| Cd             | 0.195      | 0.203      |
| Mo             | 0.159      | 0.215      |
| V              | 0.262      | 0.225      |
| U              | 0.234      | 0.267      |

**Table S2.** Elements and ratios included in the multivariate ROC model of Figure 6

| Elements | AUC  | p value (t-test) |
|----------|------|------------------|
| Mn       | 0.89 | 4.8E-11          |
| Se       | 0.72 | 2.4E-04          |
| Zn       | 0.71 | 8.1E-04          |
| Cu       | 0.64 | 3.7E-02          |
| Fe       | 0.62 | 1.6E-01          |
| Ca       | 0.55 | 3.6E-01          |
| Cu/Mn    | 0.93 | 1.6E-13          |
| Ca/Mn    | 0.91 | 1.8E-11          |
| Fe/Mn    | 0.88 | 6.3E-09          |
| Cu/Se    | 0.85 | 1.4E-08          |
| Mn/Zn    | 0.85 | 5.4E-09          |
| Mn/Se    | 0.84 | 6.9E-08          |
| Ca/Se    | 0.81 | 6.1E-07          |
| Cu/Zn    | 0.80 | 7.5E-06          |
| Ca/Zn    | 0.78 | 8.5E-06          |
| Cu/Fe    | 0.70 | 3.4E-03          |
| Ca/Fe    | 0.68 | 1.4E-02          |
| Ca/Cu    | 0.64 | 1.1E-01          |
| Fe/Se    | 0.63 | 2.8E-02          |
| Fe/Zn    | 0.59 | 9.5E-02          |
| Se/Zn    | 0.54 | 4.6E-01          |

**Figure S1.** Potential biomarkers for discriminating between HS and SMC samples and SMC and MCI samples.

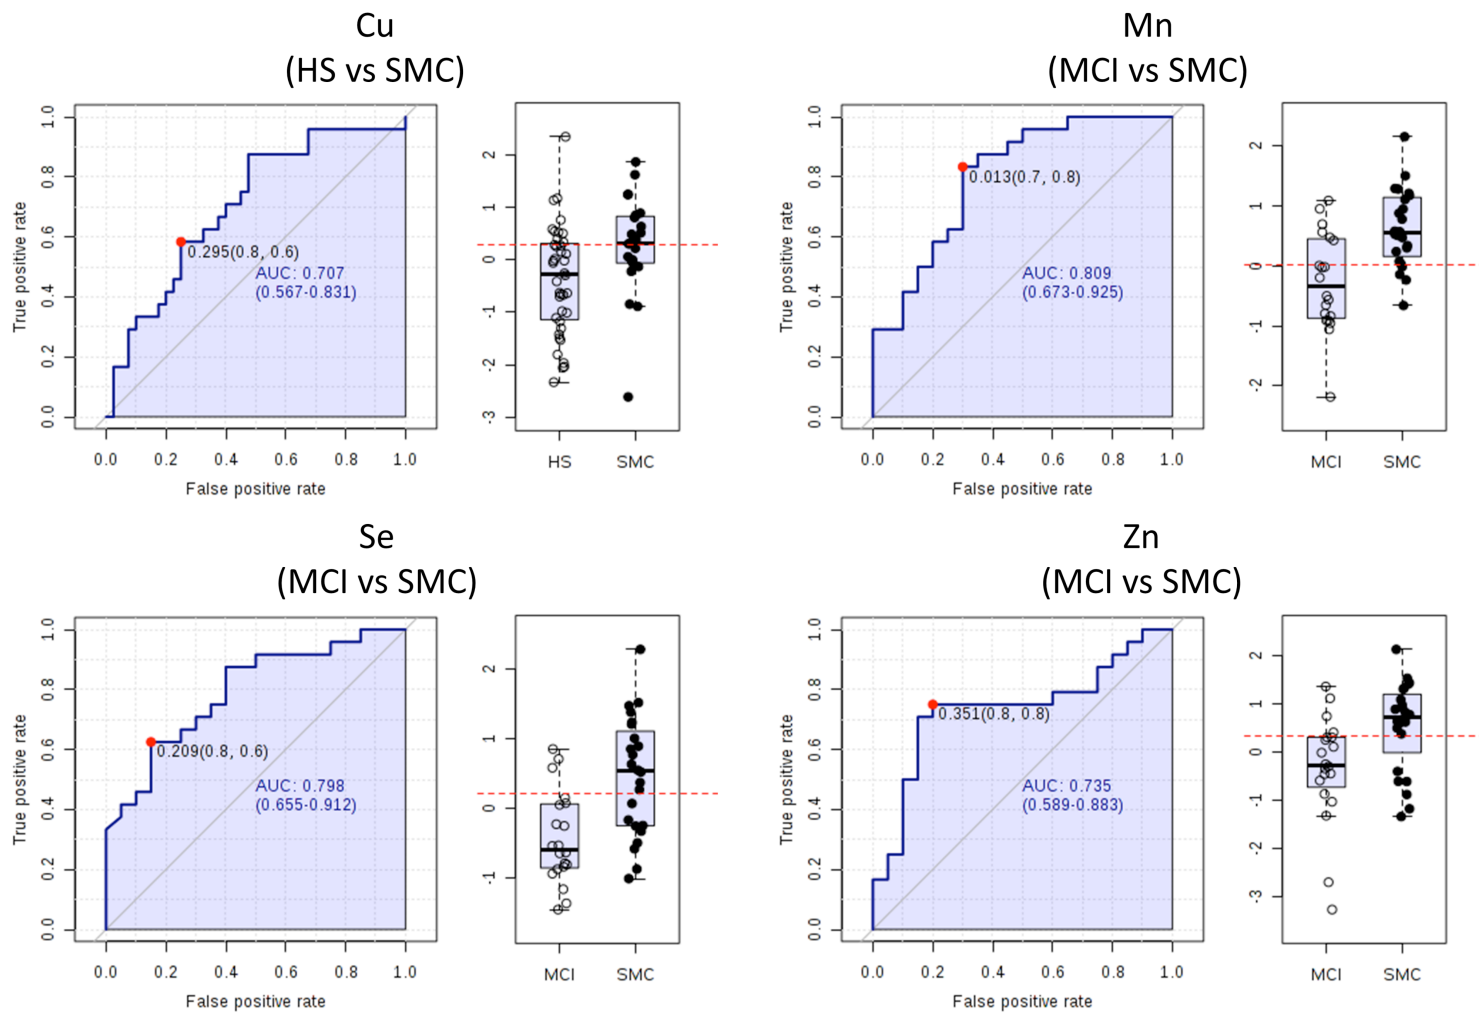

Supplement: srep22769-s1.pdf [file srep22769-s1.pdf]
